# Supplementary material
Source: Springer Nature journal article supplement (https://www.springermedizin.de/resource/supplementary/12955_2012_1091_MOESM1_ESM.pdf/9559212)
Supplement: MOESM1 [file 9559212]

**Table S1a WEMWBS scores across demographic groups for quantitative survey in Coventry**

| Variable          | Chinese |                                | Pakistani |                                |
|-------------------|---------|--------------------------------|-----------|--------------------------------|
|                   | N       | Mean (95% Confidence Interval) | N         | Mean (95% Confidence Interval) |
| All               | 41      | 52.34 (50.04 – 54.65)          | 82        | 52.00 (50.08 – 53.93)          |
| Gender*           |         |                                |           |                                |
| Male              | 29      | 53.21 (50.44-55.97)            | 57        | 52.89 (50.50-55.29)            |
| Female            | 12      | 50.25 (45.65-54.85)            | 24        | 49.75 (46.36-53.14)            |
| Age in years*     |         |                                |           |                                |
| 16-24             | 24      | 53.12 (50.08-56.17)            | 20        | 53.15 (50.50-55.8)             |
| 25-49             | 10      | 49.50 (43.55-55.45)            | 33        | 51.52 (48.04-54.99)            |
| 50-75             | 1       |                                | 7         | 51.57 (47.27-55.87)            |
| 76-90             | 1       |                                |           |                                |
| Employment Status |         |                                |           |                                |
| In work           | 3       | 51.00 (33.61-68.39)            | 41        | 53.8 (50.77-56.84)             |
| Full time student | 29      | 52.86 (50.22-55.51)            | 14        | 52.93 (50.12-55.73)            |
| No paid work      | 9       | 51.11 (44.17 – 58.06)          | 27        | 48.78 (45.49-52.06)            |

|                        |    |                         |    |                     |
|------------------------|----|-------------------------|----|---------------------|
| <b>Marital Status*</b> |    |                         |    |                     |
| Single                 | 34 | 51.68 (49.03-54.33)     | 23 | 53.26 (50.91-55.61) |
| Married                | 6  | 55.00 (49.69-60.31)     | 54 | 51.52 (48.87-54.17) |
| Other                  | 1  |                         | 2  | 57.50 (-37.8-152.8) |
| <b>Education</b>       |    |                         |    |                     |
| GCSE                   | 1  |                         | 4  | 56.50 (51.91-60.09) |
| 5 GCSE                 | 2  | 52.5 (-4.68-109.68)     | 12 | 47.50 (39.26-55.74) |
| A Level                | 14 | 52.86 (48.29-57.42)     | 18 | 53.83 (49.92-57.74) |
| Degree                 | 12 | 52.08 (48.86-55.31)     | 20 | 54.10 (50.57-57.63) |
| Unknown                | 2  | 59.00 (-17.24 - 135.24) | 7  | 54.86 (49.25-60.47) |
| None#                  | 10 | 51.00 (44.27-57.73)     | 21 | 49.19 (45.53-52.85) |

\* Numbers of participants in some categories do not always add up to the total because of missing data

# Includes "N/A" or question left out

**Table S1b WEMWBS scores across demographic groups for questionnaire in Birmingham**

|                         | Chinese |                                | Pakistani |                                |
|-------------------------|---------|--------------------------------|-----------|--------------------------------|
| Variable                | N       | Mean (95% Confidence Interval) | N         | Mean (95% Confidence Interval) |
| All                     | 111     | 48.3 (46.36 – 50.24)           | 101       | 47.71 (45.98 – 49.45)          |
| <b>Gender</b>           |         |                                |           |                                |
| Male                    | 60      | 46.68 (44.29 – 49.07)          | 51        | 47.73 (45.22 – 50.24)          |
| Female                  | 51      | 50.20 (47.03 - 53.36)          | 50        | 47.70 (45.22 – 50.18)          |
| <b>Age in years</b>     |         |                                |           |                                |
| 16-24                   | 28      | 46.89 (42.76 – 51.03)          | 27        | 50.0 (47.43 – 52.57)           |
| 25-49                   | 61      | 48.16 (45.47 – 50.85)          | 70        | 47.29 (45.03 – 49.55)          |
| 50-75                   | 22      | 50.45 (46.26 – 54.64)          | 4         | 39.75 (35.18 – 44.32)*         |
| <b>In work</b>          |         |                                |           |                                |
| Paid work               | 76      | 49.37 (47.0 – 51.74)           | 55        | 46.96 (44.60 – 49.33)          |
| Student                 | 16      | 51.50 (46.82 – 56.18)          | 16        | 51.5 (47.48 – 55.53)           |
| No paid work            | 19      | 41.32 (37.22 – 45.41)*         | 30        | 47.07 ( 43.63 – 50.51)         |
| Born in UK              | 63      | 47.71 (45.10 – 50.32)          | 55        | 48.55 (46.32 – 50.78)          |
| Born in another country | 48      | 49.06 (46.06 - 52.06)          | 46        | 46.72 (43.93 – 49.51)          |

**Table S2 Demographic description of focus group participants**

|                                                                                                | <b>Chinese N (men, women)</b> | <b>Pakistani N (men, women)</b> |
|------------------------------------------------------------------------------------------------|-------------------------------|---------------------------------|
| <b>All</b>                                                                                     | 22 (8,14)                     | 47(28,19)                       |
| <b>Age in years</b>                                                                            |                               |                                 |
| 16-24                                                                                          | 6 (1,5)                       | 17 (8,9)                        |
| 25-49                                                                                          | 9 (5,4)                       | 20 (10,10)                      |
| 50-75                                                                                          | 7 (2, 5)                      | 10 (10,0)                       |
| <b>Multiple deprivation index</b> based on postcode.<br>Number in most deprived 10% in England | 12 (54%)                      | 43 (91%)                        |
| <b>Terminal Education Age</b>                                                                  |                               |                                 |
| 15 or less                                                                                     | 3 (1,2)                       | 9 (2, 7)                        |
| 16 - 20                                                                                        | 4(1,3)                        | 21 (11, 10)                     |
| 21 or more                                                                                     | 12(5,7)                       | 8 (8, 0)                        |
| Still studying                                                                                 | 3 (1, 2)                      | 9 (7, 2)                        |
| <b>Employment</b>                                                                              |                               |                                 |
| Paid work                                                                                      | 16 (7, 9)                     | 20 (17, 3)                      |
| Student                                                                                        | 3 (1,2)                       | 9 (7, 2)                        |
| No paid work                                                                                   | 3(0, 3)                       | 18 (4, 14)                      |
